# Supplementary material for: Synergistic engineering of the Stokes shift for highly efficient and stable quasi-2D perovskite luminescent solar concentrators
Source: Royal Society of Chemistry journal article supplement (doi:10.1039/d4ta01812e), 2024-01-01
Supplement: d4ta01812e1.pdf [file d4ta01812e1.pdf]

## Supporting Information

### **Synergistic engineering of the Stokes shift for highly efficient and stable quasi-2D perovskite luminescent solar concentrators**

*Xiao-Fei Liu, Bing Sun, Xiang-Yang Li, Yong Huo\*, Chunfeng Zhang\*, Hao-Li Zhang\**

X. F. Liu, B. Sun, X. Y. Li, Y. Huo, Prof. H. L. Zhang

State Key Laboratory of Applied Organic Chemistry (SKLAOC), Key Laboratory of Special Function Materials and Structure Design (MOE), College of Chemistry and Chemical Engineering, Lanzhou University, Lanzhou 730000, P. R. China.

E-mail: haoli.zhang@lzu.edu.cn

Y. Huo

Frontier Science Center for Rare Isotopes, School of Nuclear Science and Technology, Lanzhou University, Lanzhou 730000, P. R. China.

E-mail: huoy@lzu.edu.cn

Prof. C. Zhang

National Laboratory of Solid State Microstructures, Collaborative Innovation Centre of Advanced Microstructures, School of Physics, Nanjing University, Nanjing, 210093, China.

E-mail: cfzhang@nju.edu.cn

Keywords: perovskite, luminescent solar concentrators, transient Stark shift, energy-funneling effect, external optical efficiency

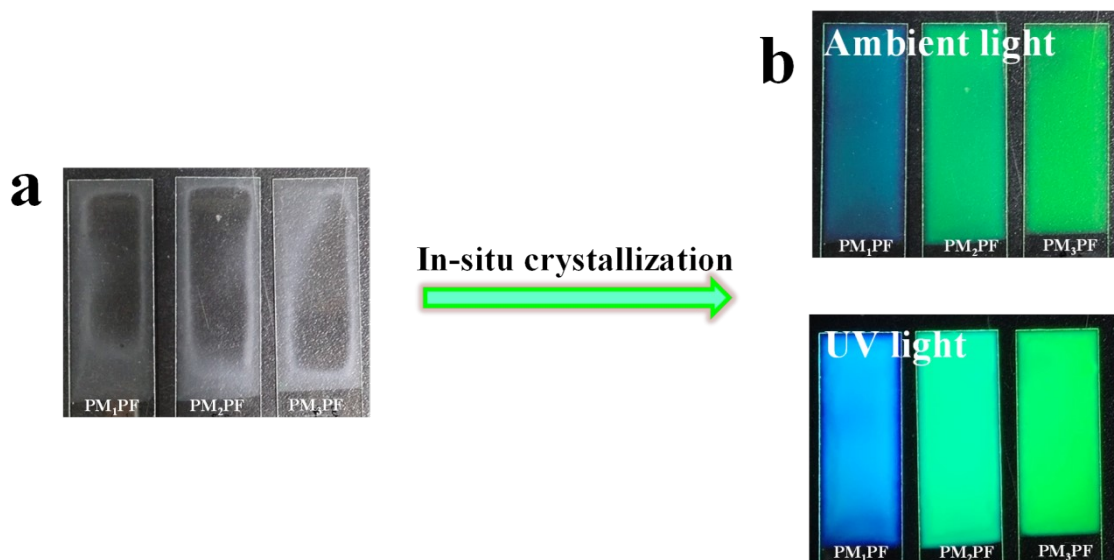

**Figure S1.** Photographs of PM<sub>x-1</sub>PF film (a) under ambient light after drying for 20 min and (b) under ambient light and UV light after drying for 18 h.

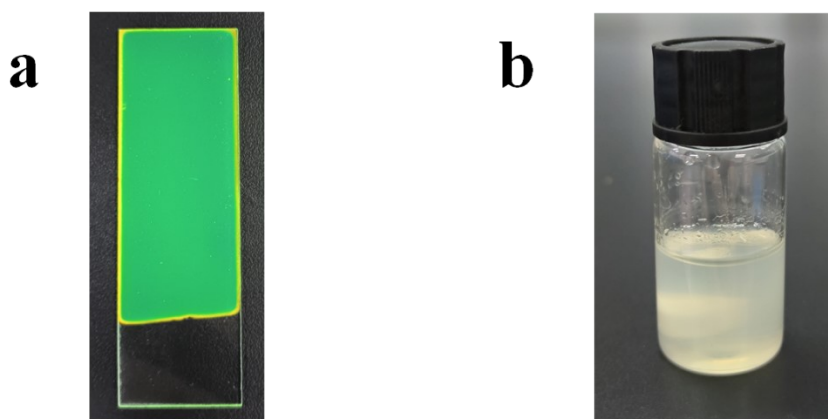

**Figure S2.** (a) Photograph of the composite film (PLQY 74.6%) under ambient light. The PVDF content in the precursor solution is 740 mg. The remaining components are consistent with those of PM<sub>3</sub>PF. (b) Photograph of the precursor solution under ambient light, the PVDF content is 940 mg and the remaining components are consistent with PM<sub>3</sub>PF.

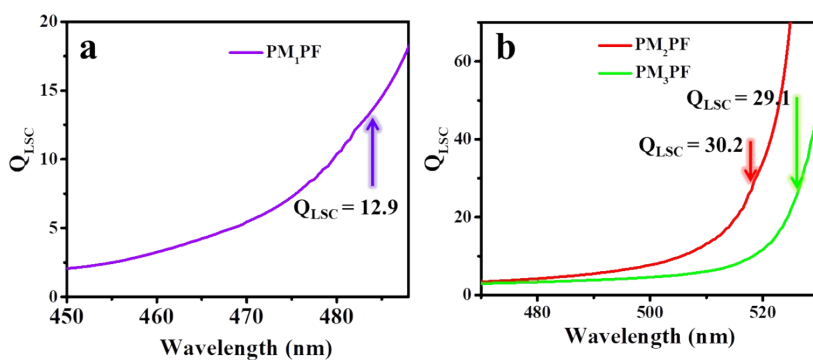

**Figure S3.** Quality factor  $Q_{LSC}$  as a function of wavelength. Here the  $Q_{LSC}$  is defined as the ratio of absorbance at the PL emission wavelength and excitation wavelength (365 nm). At the PL peak wavelength, for  $x = 2, 3$  and  $4$  of  $PM_{x-1}PF$ , the  $Q_{LSC}$  is 12.9, 30.2 and 29.1, respectively.

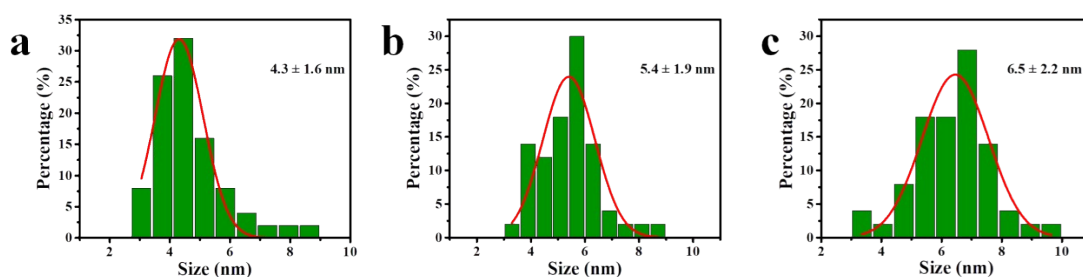

**Figure S4.** The size distributions of perovskite nanocrystals in  $PM_1PF$  (a),  $PM_2PF$  (b), and  $PM_3PF$  (c) films.

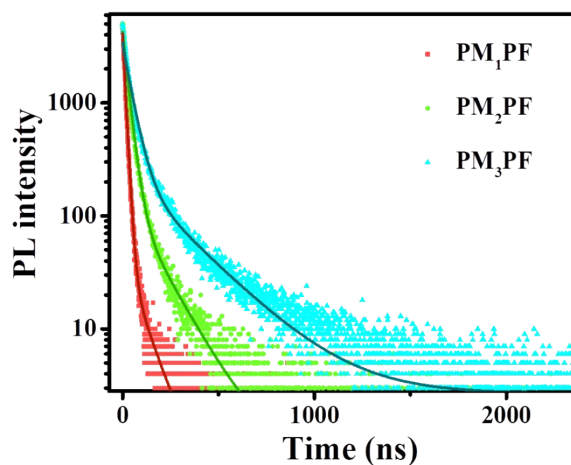

**Figure S5.** Photoluminescence decay curve of  $PM_{x-1}PF$  film.

By combining the fluorescence lifetime and PLQY the radiative decay rate ( $K_r$ ) and the

nonradiative decay rate ( $K_{nr}$ ) of quantum dots can be calculated by the following equations

$$\tau_{avg} = (K_r + K_{nr})^{-1} \quad (1)$$

$$PLQY = K_r(K_r + K_{nr})^{-1} \quad (2)$$

**Table S1.** Fitting parameters of photoluminescence decay curve of  $PM_{x-1}$ PF film.

|           | $\tau_1$ (ns) | $A_1$ (%) | $\tau_2$ (ns) | $A_2$ (%) | $\tau_{avg}$ (ns) | $K_r$ ( $\mu s^{-1}$ ) | $K_{nr}$ ( $\mu s^{-1}$ ) | $K_r/K_{nr}$ | PLQY(%) |
|-----------|---------------|-----------|---------------|-----------|-------------------|------------------------|---------------------------|--------------|---------|
| $PM_1$ PF | 13.0          | 98.9      | 83.3          | 1.1       | 17.8              | 13.46                  | 42.6                      | 0.316        | 24.0    |
| $PM_2$ PF | 27.0          | 96.4      | 141.1         | 3.6       | 45.7              | 21.10                  | 0.80                      | 26.3         | 96.3    |
| $PM_3$ PF | 43.6          | 92.8      | 254.5         | 7.2       | 109.1             | 8.94                   | 0.23                      | 39.5         | 97.5    |

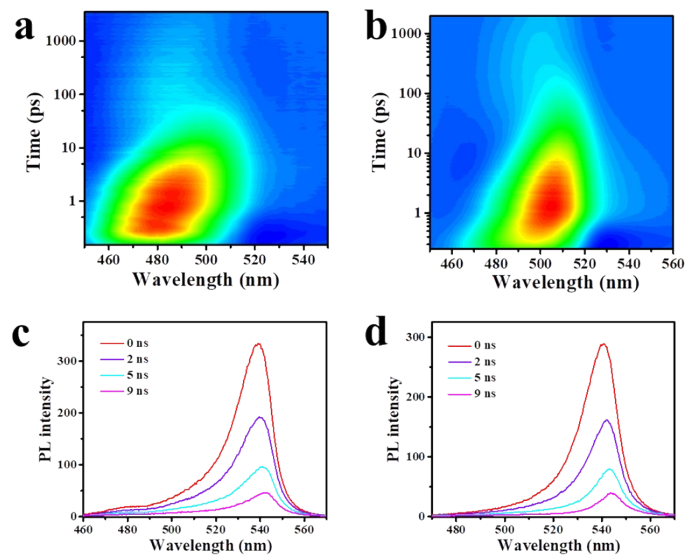

**Figure S6.** Transient-absorption spectra for  $PM_2$ PF (a) and  $PM_3$ PF (b) TRES at different time delays of the film  $PM_2$ PF (c) and  $PM_3$ PF (d).

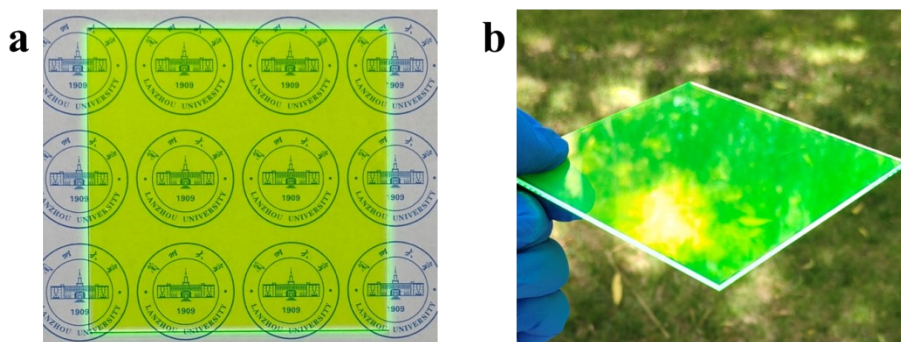

**Figure S7.** Photograph of LSC ( $10\text{ cm} \times 10\text{ cm} \times 0.2\text{ cm}$ ) under indoor (a) and outdoor (b) ambient light.

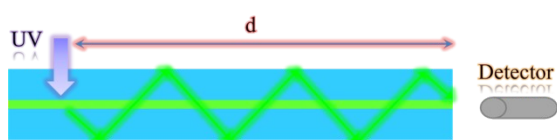

**Figure S8.** Schematic diagram of optical waveguide test.

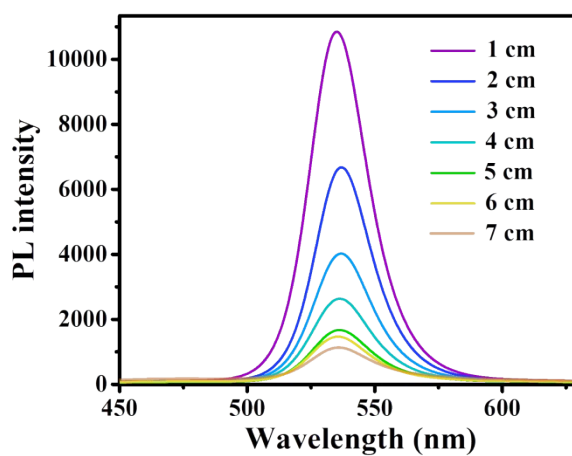

**Figure S9.** Photoluminescence spectra of MAPM film at different distances.

**Table S2.** Performance of different sizes of LSC.

| Dimensions                                             | Light Source | PLQY (%) | OQE (%) | $\eta_{\text{ext}}$ (%) |
|--------------------------------------------------------|--------------|----------|---------|-------------------------|
| $2\text{ cm} \times 2\text{ cm} \times 0.15\text{ cm}$ | 430 nm       | 94.5     | 56.6    | 6.7                     |
| $5\text{ cm} \times 5\text{ cm} \times 0.15\text{ cm}$ | 430 nm       | 81.8     | 49.5    | 5.1                     |

**Table S3.** External optical efficiency of different LSCs based on organic-inorganic hybrid and inorganic perovskite at similar size.

| Type                                | Material                                                             | LSC dimension (cm) | $\eta_{\text{ext}}$ (%) |                                              |
|-------------------------------------|----------------------------------------------------------------------|--------------------|-------------------------|----------------------------------------------|
| Organic-inorganic hybrid perovskite | PM <sub>2</sub> PF                                                   | 10 × 10 × 0.2      | 4.9                     | This work                                    |
|                                     | HA <sub>2</sub> MA <sub>x-1</sub> Pb <sub>x</sub> I <sub>3x+1</sub>  | 10 × 10 × 0.2      | 2.0                     | <i>Joule</i> 2020, 4, 631-643                |
|                                     | FAPbBr <sub>3</sub> NCs                                              | 10 × 10            | 0.9                     | <i>J. Mater. Chem. A</i> 2019, 7, 4872.      |
|                                     | HA <sub>2</sub> MA <sub>x-1</sub> Pb <sub>x</sub> Br <sub>3x+1</sub> | 10 × 10 × 0.2      | 1.44                    | <i>Nature Energy</i> 2019, 4, 197-205        |
|                                     | FAPbBr <sub>3</sub> NCs                                              | 10 × 10            | 0.9                     | <i>J. Mater. Chem. A</i> 2019, 7, 4872.      |
| Inorganic perovskite                | CsPbI <sub>3</sub> NCs                                               | 5 × 15             | 3.1                     | <i>Angew. Chem. Int. Ed.</i> 2020, 59, 7738. |
|                                     | Cs <sub>4</sub> PbBr <sub>6</sub> NCs                                | 10 × 10 × 0.2      | 2.4                     | <i>Adv. Funct. Mater.</i> 2019, 29, 1902262. |
|                                     | CsPbBr <sub>0.6</sub> I <sub>2.4</sub> NCs                           | 10 × 10 × 0.2      | 2.4                     | <i>Nano Energy</i> 2017, 37, 214.            |

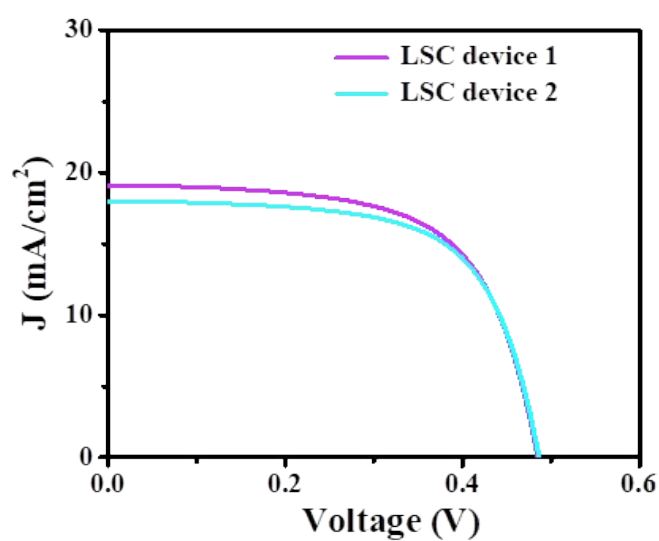

**Figure S10.** J-V curve of Si solar cell with coupled LSC (AM 1.5 G), the  $\eta_{\text{ext}}$  of LSC device 1 and device 2 are 4.9% and 4.6% respectively.
